# Supplementary material for: In situ construction of hydrazone-linked COF-based core–shell hetero-frameworks for enhanced photocatalytic hydrogen evolution
Source: Royal Society of Chemistry journal article supplement (doi:10.1039/d0ta00901f), 2020-01-01
Supplement: d0ta00901f1.pdf [file d0ta00901f1.pdf]

## Electronic Supplementary Information

### ***In-situ* construction of hydrazone-linked COF-based core-shell**

### **hetero-frameworks for enhanced photocatalytic hydrogen evolution**

Yao Chen,<sup>ad</sup> Dong Yang,<sup>bc</sup> Benbing Shi,<sup>ab</sup> Wei Dai,<sup>b</sup> Hanjie Ren,<sup>ad</sup> Ke An,<sup>ad</sup>

Zhiyuan Zhou,<sup>abd</sup> Zhanfeng Zhao,<sup>ad</sup> Wenjing Wang,<sup>abd</sup> and Zhongyi Jiang<sup>\*ade</sup>

<sup>a</sup> Key Laboratory for Green Chemical Technology, School of Chemical Engineering and Technology, Tianjin University, Tianjin 300072, China

<sup>b</sup> Key Laboratory of Systems Bioengineering of Ministry of Education, School of Chemical Engineering and Technology, Tianjin University, Tianjin 30072, China

<sup>c</sup> School of Environmental Science and Engineering, Tianjin University, 300072 Tianjin, China

<sup>d</sup> Collaborative Innovation Center of Chemical Science and Engineering (Tianjin), Tianjin 300072, China

<sup>e</sup> Joint School of National University of Singapore and Tianjin University, International Campus of Tianjin University, Binhai New City, Fuzhou, 350207, P. R. China

\* E-mail: [zhyjiang@tju.edu.cn](mailto:zhyjiang@tju.edu.cn) Tel: 86-22-23500086, Fax: 86-22-23500086

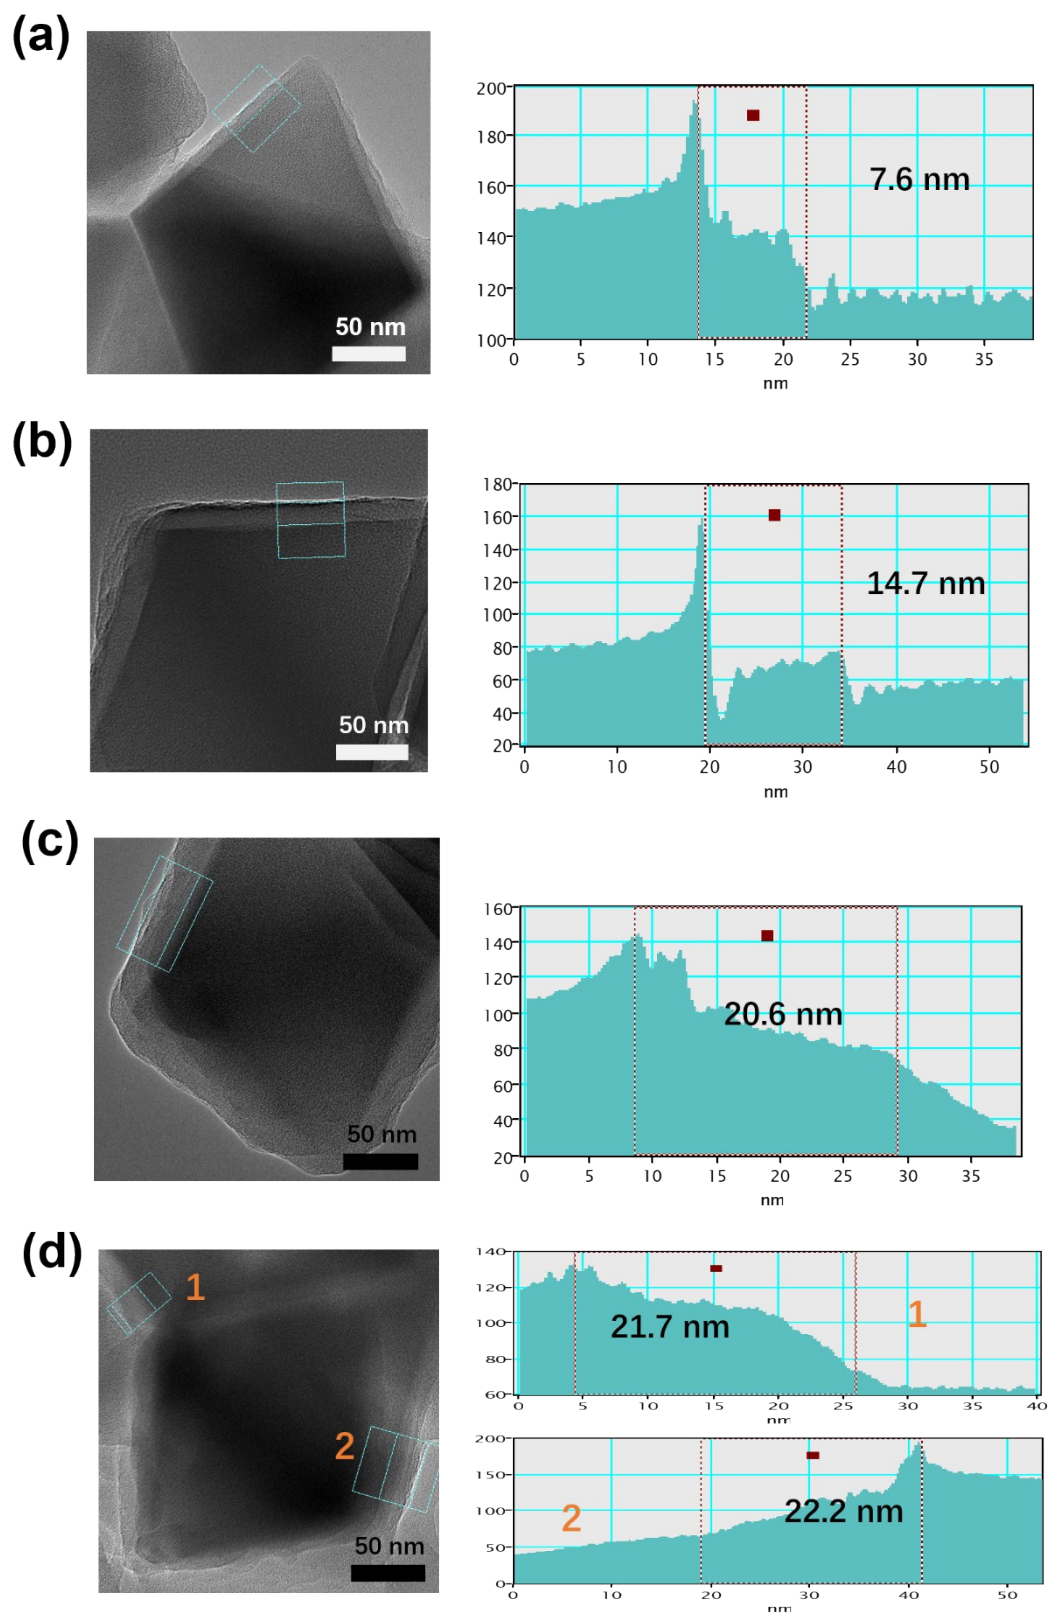

**Fig. S1.** TEM images (a) U@TDE1, (b) U@TDE2, (c) U@TDE4 and (d) U@TDE6. The right of each TEM image is the thickness profile of boxed regions obtained by Digital Micrograph software.

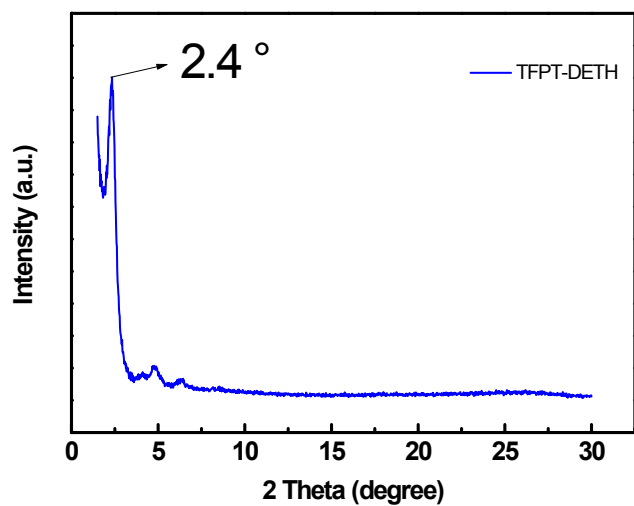

Fig. S2. Small-angle XRD patterns of TFPT-DETH.

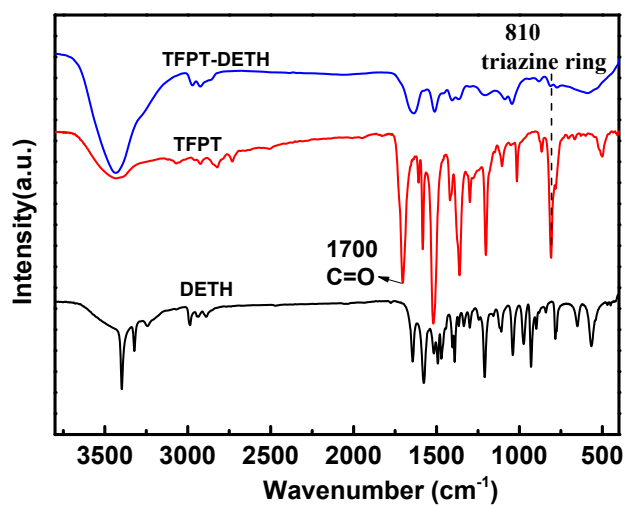

Fig. S3. FT-IR spectra of TFPT, DETH and TFPT-DETH.

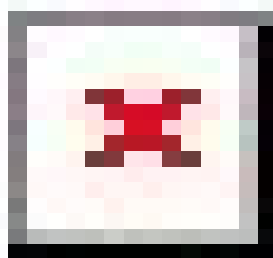

Fig. S4. Solid state <sup>13</sup>C NMR spectra of TFPT-DETH and U@TDE4.

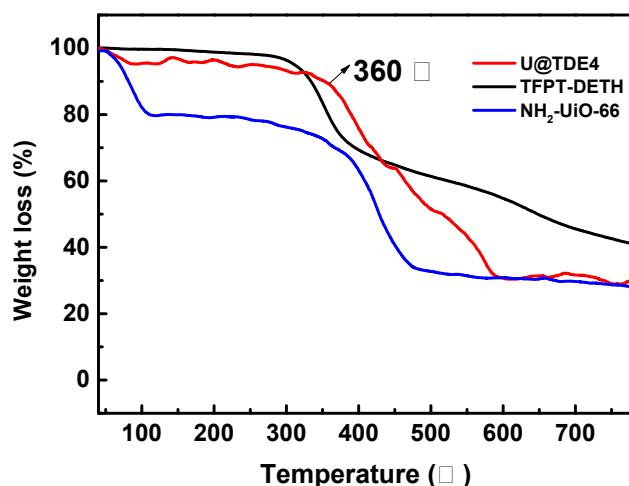

Fig. S5. TGA curves of NH<sub>2</sub>-UiO66, TFPT-DETH and U@TDE4.

**Table S1.** Photocatalytic hydrogen evolution activity of the U@TDE4 hetero-framework compared with published work of pure COFs and COF-based photocatalysts.

| Catalyst                              | Co catalyst                            | Sacrificial agent                                  | Solvent       | Illumination       | Activity (μmolg <sup>-1</sup> h <sup>-1</sup> ) | AQE                | Ref |
|---------------------------------------|----------------------------------------|----------------------------------------------------|---------------|--------------------|-------------------------------------------------|--------------------|-----|
| CdS NPs/CTF-1                         | Pt                                     | Lactic acid                                        | Water         | ≥420 nm,<br>300 W  | 12150                                           | □                  | 1   |
| CTF-BT/Th-1                           | Pt                                     | TEOA                                               | Water         | ≥ 420 nm,<br>300 W | 6600                                            | 7.3% at<br>420 nm  | 2   |
| CdS/TPPA-2                            | Pt                                     | Lactic acid                                        | Water         | ≥ 420 nm,<br>400 W | 3678                                            | □                  | 3   |
| TiO <sub>2</sub> @BpZn-COP            | Pt                                     | TEOA                                               | Water         | ≥420 nm,<br>300 W  | 1333                                            | 2.5% at<br>420 nm  | 4   |
| NH <sub>2</sub> -MIL-125(Ti)/B-CTF-1  | Pt                                     | TEOA                                               | Water         | ≥ 420 nm,<br>300 W | 360                                             | □                  | 5   |
| FS-COF                                | Pt                                     | SA                                                 | Water         | ≥ 420 nm,<br>300 W | 10100                                           | 3.2% at<br>420 nm  | 6   |
| TpPa-1-COF                            | MoS <sub>2</sub>                       | SA                                                 | Water         | ≥ 420 nm,<br>300 W | 5585                                            | 0.76% at<br>420 nm | 7   |
| g-C <sub>40</sub> N <sub>3</sub> -COF | Pt                                     | TEOA                                               | Water         | ≥420 nm,<br>300 W  | 4120                                            | 4.84%<br>at 420nm  | 8   |
| COP-TF@CNi <sub>2</sub> P             | CNi <sub>2</sub> P                     | Na <sub>2</sub> SO <sub>3</sub> /Na <sub>2</sub> S | Seawater      | ≥ 400 nm,<br>300 W | 2500                                            | □                  | 9   |
| NUS-55*                               | [Co(bpy) <sub>3</sub> ]Cl <sub>2</sub> | TEA                                                | Water/Ethanol | ≥420 nm,<br>300 W  | 2480                                            |                    | 10  |
| TFPT-COF*                             | Pt                                     | TEOA                                               | Water         | ≥420 nm,<br>300 W  | 1970                                            | 2.2% at<br>400 nm  | 11  |

|                     |                              |      |            |                    |       |                    |              |
|---------------------|------------------------------|------|------------|--------------------|-------|--------------------|--------------|
| TpPa-2-COF          | Ni(OH) <sub>2</sub>          | SA   | PBS Buffer | ≥420 nm,<br>300 W  | 1896  | □                  |              |
| N <sub>3</sub> -COF | Pt                           | TEOA | PBS Buffer | ≥420 nm,<br>300 W  | 1703  | 0.15% at<br>400 nm | 13           |
| TpDTz-COF           | Ni-thiolate                  | TEOA | Water      | AM 1.5             | 941   | □                  | 14           |
| TTR-COF*            | Au                           | TEOA | Water      | ≥420 nm,<br>300 W  | 430   | □                  | 15           |
| TP-BDDA-COF         | Pt                           | TEOA | Water      | ≥ 395 nm,<br>300 W | 324   | 1.30% at<br>420 nm | 16           |
| COF-42*             | [Co(dmgH) <sub>2</sub> pyCl] | TEOA | ACN/Water  | AM1.5              | 233   | □                  | 17           |
| A-TEBPY-COF         | Pt                           | TEOA | PBS Buffer | AM 1.5             | 98    | □                  | 18           |
| PTP-COF             | Pt                           | TEOA | PBS Buffer | AM 1.5             | 83.83 | □                  | 19           |
| U@TDE4              | Pt                           | SA   | PBS Buffer | ≥420 nm,<br>300 W  | 7178  | 1.11% at<br>420 nm | This<br>work |
| TFPT-COF            | Pt                           | SA   | PBS Buffer | ≥420 nm,<br>300 W  | 2301  | □                  | This<br>work |

\* represents hydrazone-linked COFs.

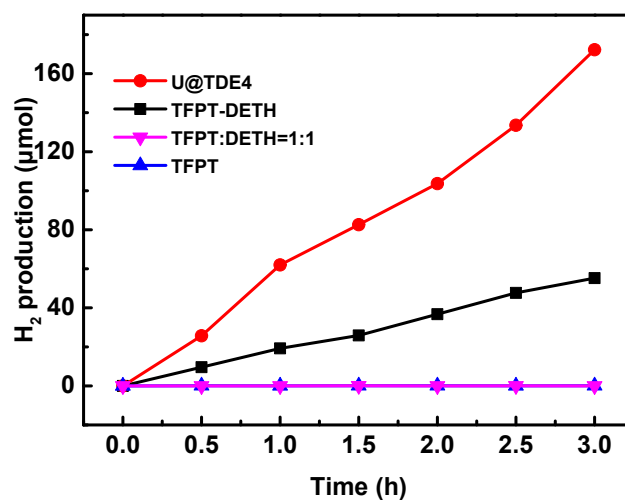

**Fig. S6.** Hydrogen evolution curves of TFPT, physical mixture of DETH and TFPT (1: 1), TFPT-DETH and U@TDE4 under visible light irradiation ( $\lambda \geq 420$  nm).

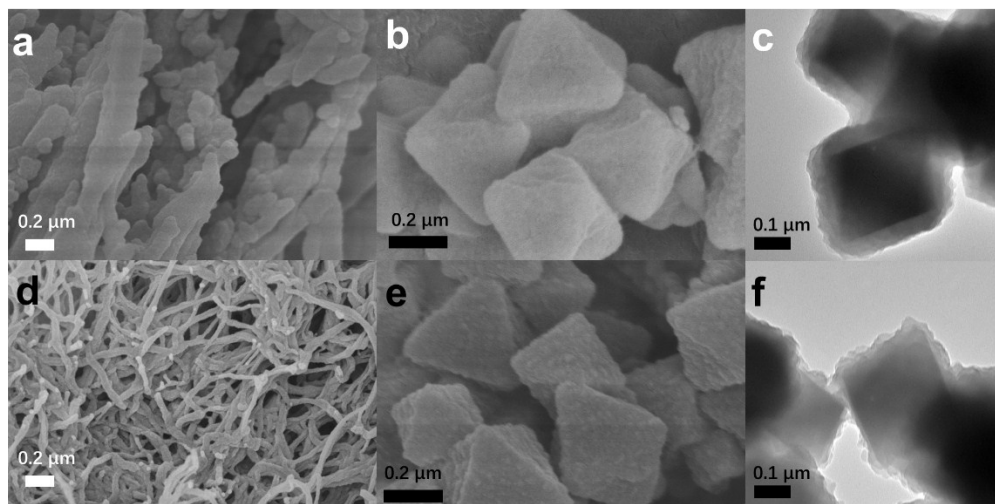

**Fig. S7.** SEM images of (a) TFPT-DMTH and (b) U@TDM4; (c) TEM images of U@TDM4; SEM images of (d) TFPT-DPP and (e) U@TDP4; (f) TEM images of U@TDP4.

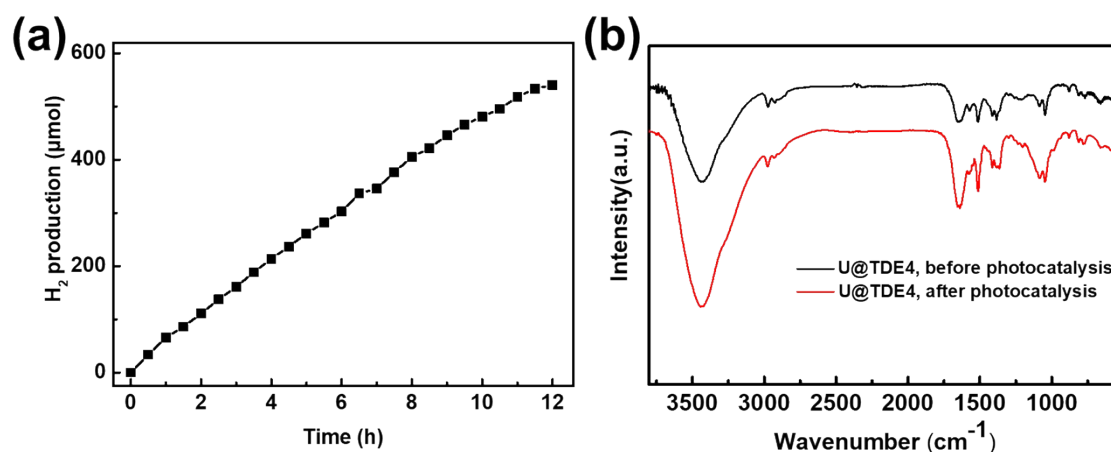

**Fig. S8.** (a) Long-term hydrogen evolution curve over U@TDE4 under visible light ( $\geq 420$  nm) irradiation; (b) FTIR spectra of U@TDE4 before and after photocatalysis for 12 h.

## Notes and references

1. D. Wang, X. Li, L. L. Zheng, L. M. Qin, S. Li, P. Ye, Y. Li and J. P. Zou, *Nanoscale*, 2018, **10**, 19509-19516.
2. W. Huang, Q. He, Y. P. Hu and Y. G. Li, *Angew. Chem., Int. Ed.*, 2019, **58**, 8676-8680.
3. J. Thote, H. B. Aiyappa, A. Deshpande, D. D. Diaz, S. Kurungot and R. Banerjee, *Chem. - Eur. J.*, 2014, **20**, 15961-15965.
4. Q. Q. Yang, P. Peng and Z. H. Xiang, *Chem. Eng. Sci.*, 2017, **162**, 33-40.
5. F. Li, D. K. Wang, Q. J. Xing, G. Zhou, S. S. Liu, Y. Li, L. L. Zheng, P. Ye and J. P. Zou, *Appl. Catal., B*, 2019, **243**, 621-628.
6. X. Wang, L. Chen, S. Y. Chong, M. A. Little, Y. Wu, W. H. Zhu, R. Clowes, Y. Yan, M. A. Zwijnenburg, R. S. Sprick and A. I. Cooper, *Nature Chemistry*, 2018, **10**, 1180-1189.
7. M. Y. Gao, C. C. Li, H. L. Tang, X. J. Sun, H. Dong and F. M. Zhang, *J. Mater. Chem. A*, 2019, **7**, 20193-20200.
8. S. Bi, C. Yang, W. Zhang, J. Xu, L. Liu, D. Wu, X. Wang, Y. Han, Q. Liang and F. Zhang, *Nat. Commun.*, 2019, **10**, 2467-2476.
9. Y. Y. Liu and Z. H. Xiang, *ACS Appl. Mater. Interfaces*, 2019, **11**, 41313-41320.
10. J. Wang, J. Zhang, S. B. Peh, G. Liu, T. Kundu, J. Dong, Y. Ying, Y. Qian and D. Zhao, *Sci. China. Chem.*, 2019, **63**, 192-197.
11. L. Stegbauer, K. Schwinghammer and B. V. Lotsch, *Chem. Sci.*, 2014, **5**, 2789-2793.
12. H. Dong, X. B. Meng, X. Zhang, H. L. Tang, J. W. Liu, J. H. Wang, J. Z. Wei, F. M. Zhang, L. L. Bai and X. J. Sun, *Chem. Eng. J.*, 2020, **379**, 122342-122350.
13. V. S. Vyas, F. Haase, L. Stegbauer, G. k. Savasci, F. Podjaski, C. Ochsenfeld and B. V. Lotsch, *Nat. Commun.*,

- 
- 2015, **6**, 8508-8516.
14. B. P. Biswal, H. A. Vignolo-Gonzalez, T. Banerjee, L. Grunenberg, G. Savasci, K. Gottschling, J. Nuss, C. Ochsenfeld and B. V. Lotsch, *J. Am. Chem. Soc.*, 2019, **141**, 11082-11092.
  15. L. Y. Li, Z. M. Zhou, L. Y. Li, Z. Y. Zhuang, J. H. Bi, J. H. Chen, Y. Yu and J. G. Yu, *ACS Sustainable Chem. Eng.*, 2019, **7**, 18574-18581.
  16. P. Pachfule, A. Acharjya, J. Roeser, T. Langenhahn, M. Schwarze, R. Schomacker, A. Thomas and J. Schmidt, *J. Am. Chem. Soc.*, 2018, **140**, 1423-1427.
  17. T. Banerjee, F. Haase, G. Savasci, K. Gottschling, C. Ochsenfeld and B. V. Lotsch, *J. Am. Chem. Soc.*, 2017, **139**, 16228-16234.
  18. L. Stegbauer, S. Zech, G. Savasci, T. Banerjee, F. Podjaski, K. Schwinghammer, C. Ochsenfeld and B. V. Lotsch, *Adv. Energy Mater.*, 2018, **8**, 1703278-1703285.
  19. F. Haase, T. Banerjee, G. Savasci, C. Ochsenfeld and B. V. Lotsch, *Faraday Discuss.*, 2017, **201**, 247-264.
